# Supplementary material for: TGFβR2 is a major target of miR-93 in nasopharyngeal carcinoma aggressiveness
Source: PubMed Central journal article supplement (PMC4016586; doi:10.1186/1476-4598-13-51), 2014-03-08
Supplement: 1476-4598-13-51-S2.pdf [file 1476-4598-13-51-S2.pdf]

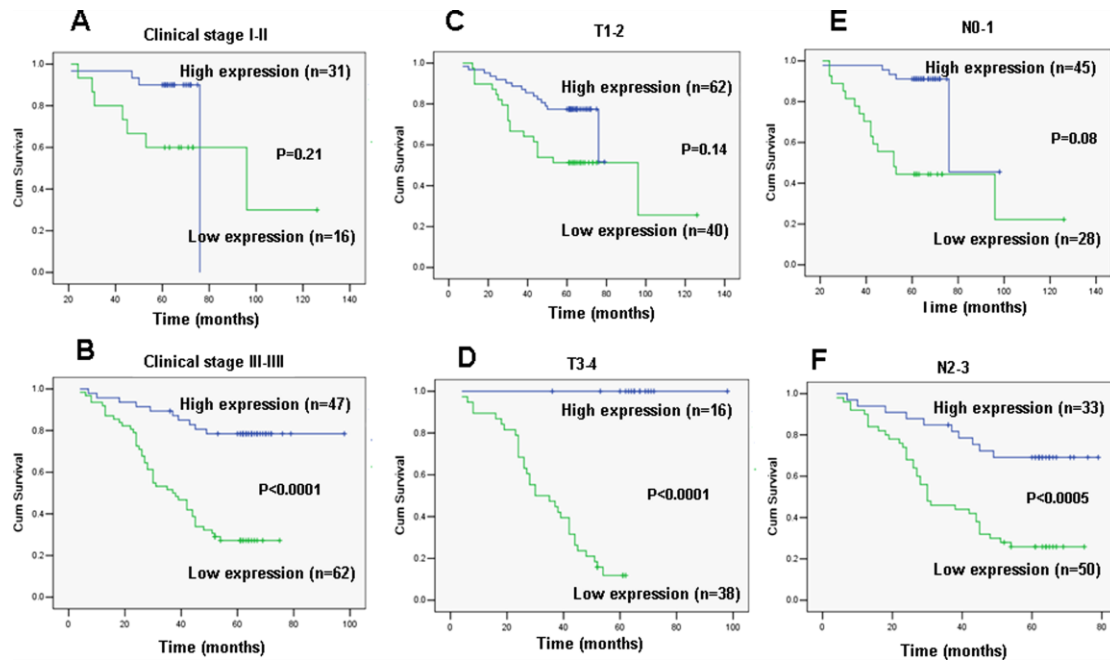

**Supplementary Figure 1** Kaplan–Meier survival analysis of overall survival correlated to NPC TNM classification. **(A, B)** Cumulative survival in early-stage patients and late-stage patients according to TGFβR2 expression. **(C, D)** Survival analysis in T1-2 patients and T3-4 patients according to TGFβR2 expression. **(E, F)** Survival analysis in N0-1 patients and N2-3 patients according to TGFβR2 expression. The log-rank test was used to calculate p values.

**A**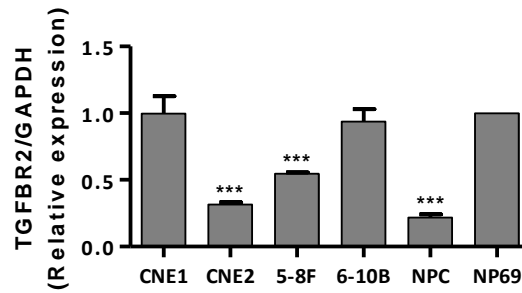**B**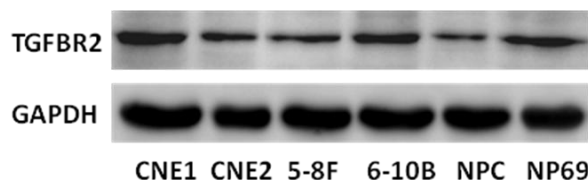

**Supplementary Figure 2 (A)** QRT-PCR analysis of TGF $\beta$ 2 expression in the indicated NPC cell lines and NPC tissue (3 NPC samples were pooled). Values represent mean  $\pm$  SD; n = 3. \*\*\*P<0.001. **(B)** Western blotting analysis of TGF $\beta$ 2 expression in the indicated NPC cells, NPC tissue (3 NPC samples were pooled) and NP69 cells, GAPDH was used as a loading control.

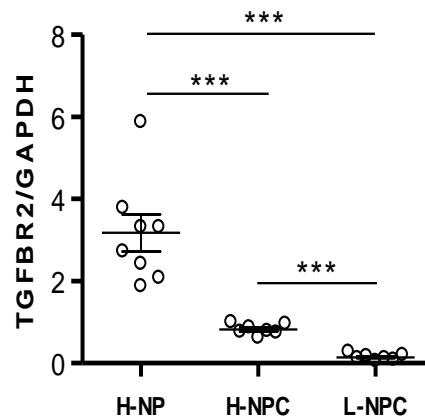

**Supplementary Figure 3** TGF $\beta$ 2 expression levels in three subgroups including 8 NP with high TGF $\beta$ 2 expression (H-NP), 7 NPC samples with high TGF $\beta$ 2 expression (H-NPC), and 7 NPC samples with low TGF $\beta$ 2 expression(L-NPC). The means  $\pm$  SD were 3.173  $\pm$  0.4511, 0.821  $\pm$  0.05008 and 0.146  $\pm$  0.02816, respectively. \*\*\* P < 0.001.

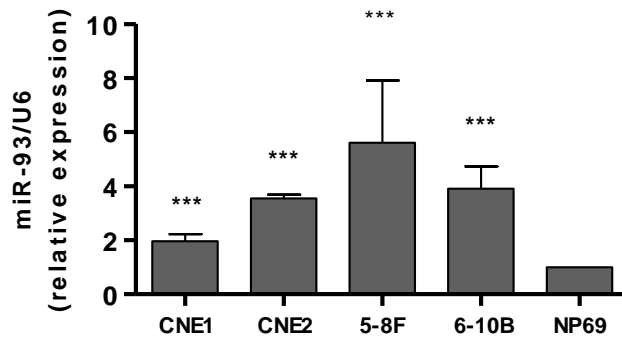

**Supplementary Figure 4** miR-93 expression in NPC cell lines (CNE1, CNE2, 5-8F and 6-10B) and immortalized Nasopharyngeal epithelial cell, NP69. Values represent mean  $\pm$  SD; n = 3. \*\*\*P < 0.001.

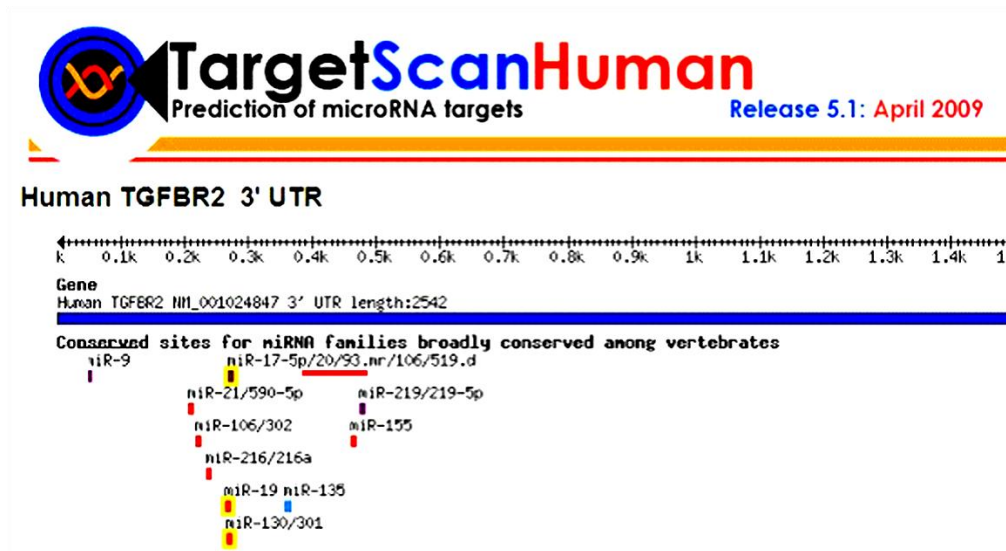

**Supplementary Figure 5** TargetScan prediction of miRNAs targeting 3' UTR of TGF $\beta$ R2 gene. A couple of candidate miRNA binding sites including miR-93 in the 3'UTR of TGF $\beta$ R2. TargetScan is release 5.1 (<http://targetscan.org/>) .

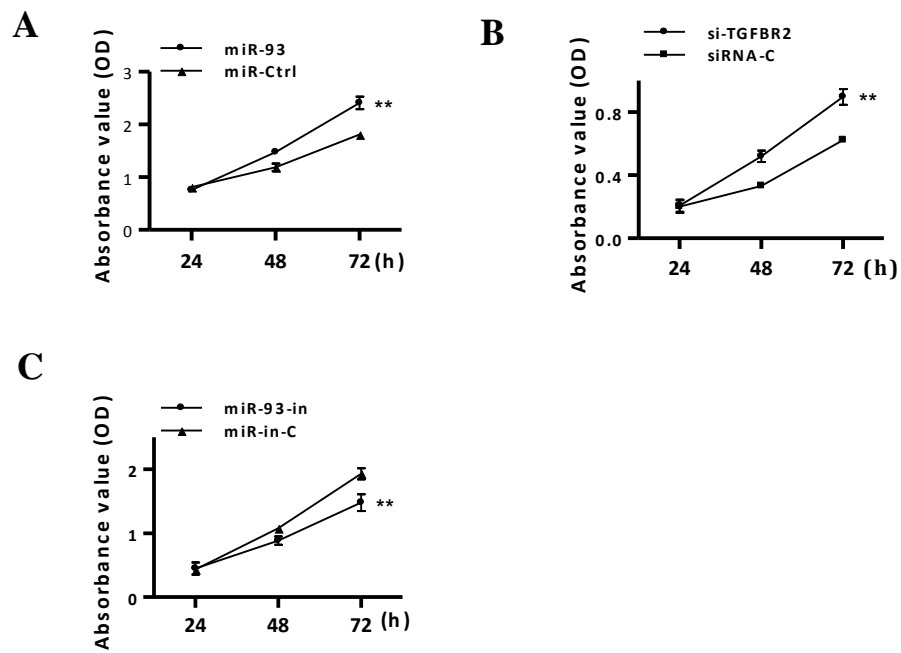

**Supplementary Figure 6** Effect of *miR-93* mimic, inhibitor and siRNA-TGF $\beta$ R2 on cell proliferation as detected by MTT assay in indicated cells. Data are presented as mean  $\pm$  SEM for three independent experiments. \*\* $p < 0.01$ .

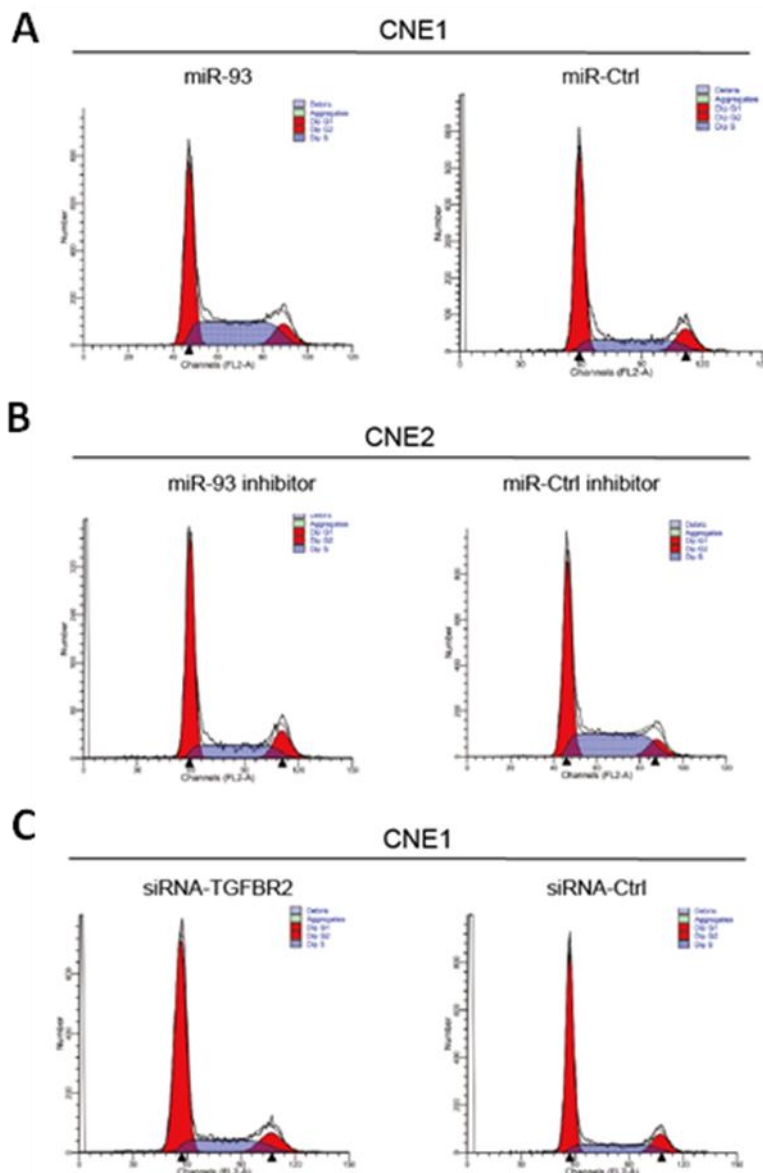

**Supplementary Figure 7** Flow cytometry analysis by FACS Caliber cytometry. **(A, C)** The cell cycle distribution in CNE1 cells transfected with miR-93 mimic, siRNA-TGFBR2 and miR-/siRNA-Ctrls. **(B)** The cell cycle distribution in CNE2 cells transfected with miR-93 inhibitor and miR-control.

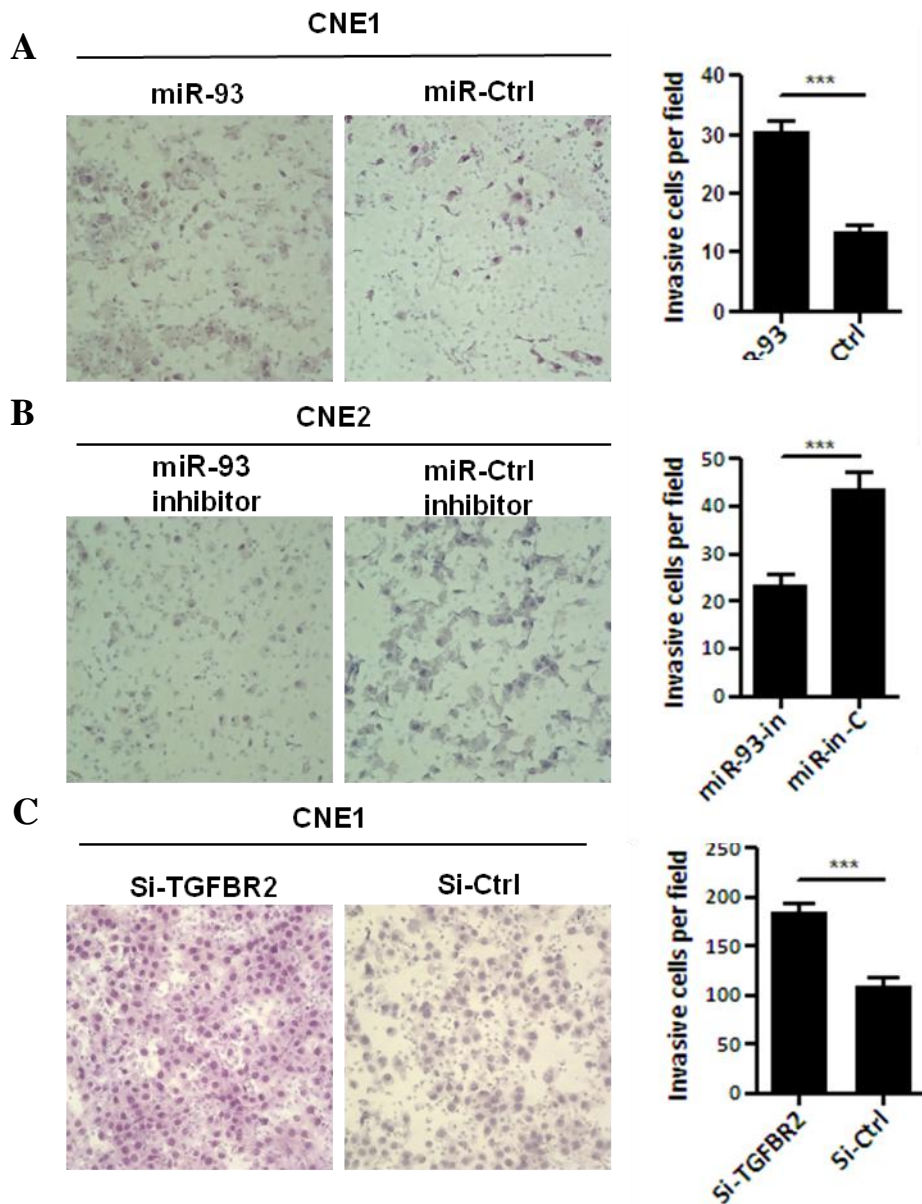

**Supplementary Figure 8** MiR-93-mediated TGF $\beta$ R2 down-regulation promotes NPC cell invasion. (A, C) The invasion assays (in a modified Boyden chamber) in the indicated CNE1 cells. (B) The invasion assays in the indicated CNE2 cells. Data are presented as mean  $\pm$  SEM of cells attached to the lower surface of the membrane in different cell groups for three independent experiments (400 $\times$ ). \*\*\* P<0.001.

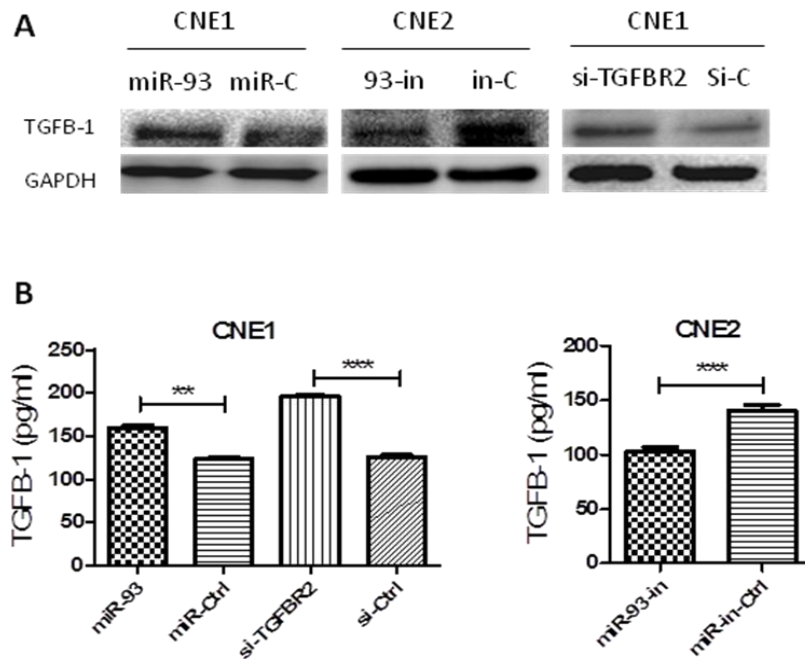

**Supplementary Figure 9** miR-93-mediated TGF $\beta$ 2 down-regulation results in a relatively higher level of TGF- $\beta$ 1 intracellular expression and secretion. **(A)** Western blotting analysis of TGF- $\beta$ 1 expression in the indicated cell groups. GAPDH was used as a loading control. **(B)** ELASA assay of TGF- $\beta$ 1 concentration in the culture supernatants of indicated cells in triplicate. \* P<0.05, \*\*P<0.01, \*\*\*P<0.001.

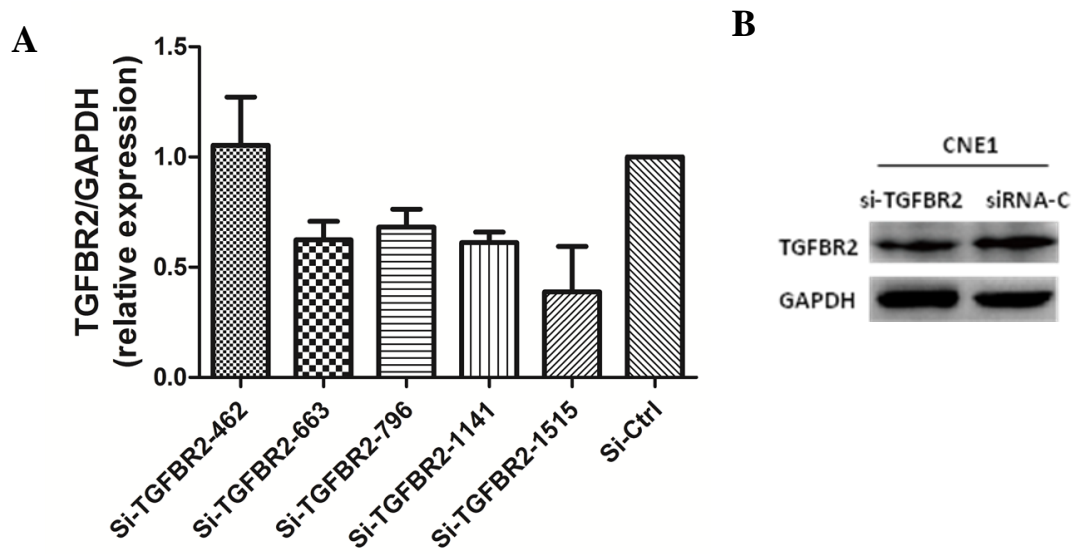

**Supplementary Figure 10** The interference efficiency of TGF $\beta$ R2 interference fragments. **(A)** QRT-PCR analysis of the TGF $\beta$ R2 expression in the indicated CNE1 cells. Values represent mean  $\pm$  SD; n = 3. **(B)** Western blotting of TGF $\beta$ R2 protein expression in CNE1 cells treated with si-TGF $\beta$ R2-1515 interference fragments.



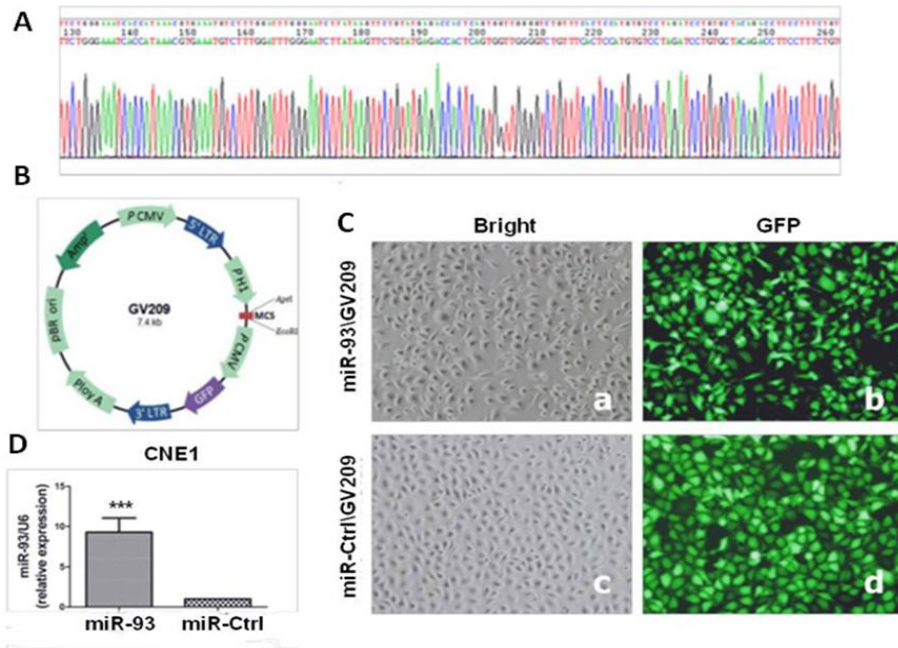

**Supplementary Figure 11** Lentiviral vectors (miR-93\GV209 and miR-ctrl\GV209) were constructed for the transfection. **(A)** Sequencing result of miR-93\GV209 derived from the recombinant plasmid. **(B)** Structure of GV209 (H1-MCS-CMV-EGFP). **(C)** CNE1 cells transfected with miR-93\GV209 were observed under (a) visible light and (b) fluorescence microscope (200×). Cells treated by miR-ctrl\GV209 were observed under (c) visible light and (d) fluorescence microscope (200×). **(D)** Detection of miR-93 expression in the indicated cells by qRT-PCR. \*\*\* $P < 0.001$ .

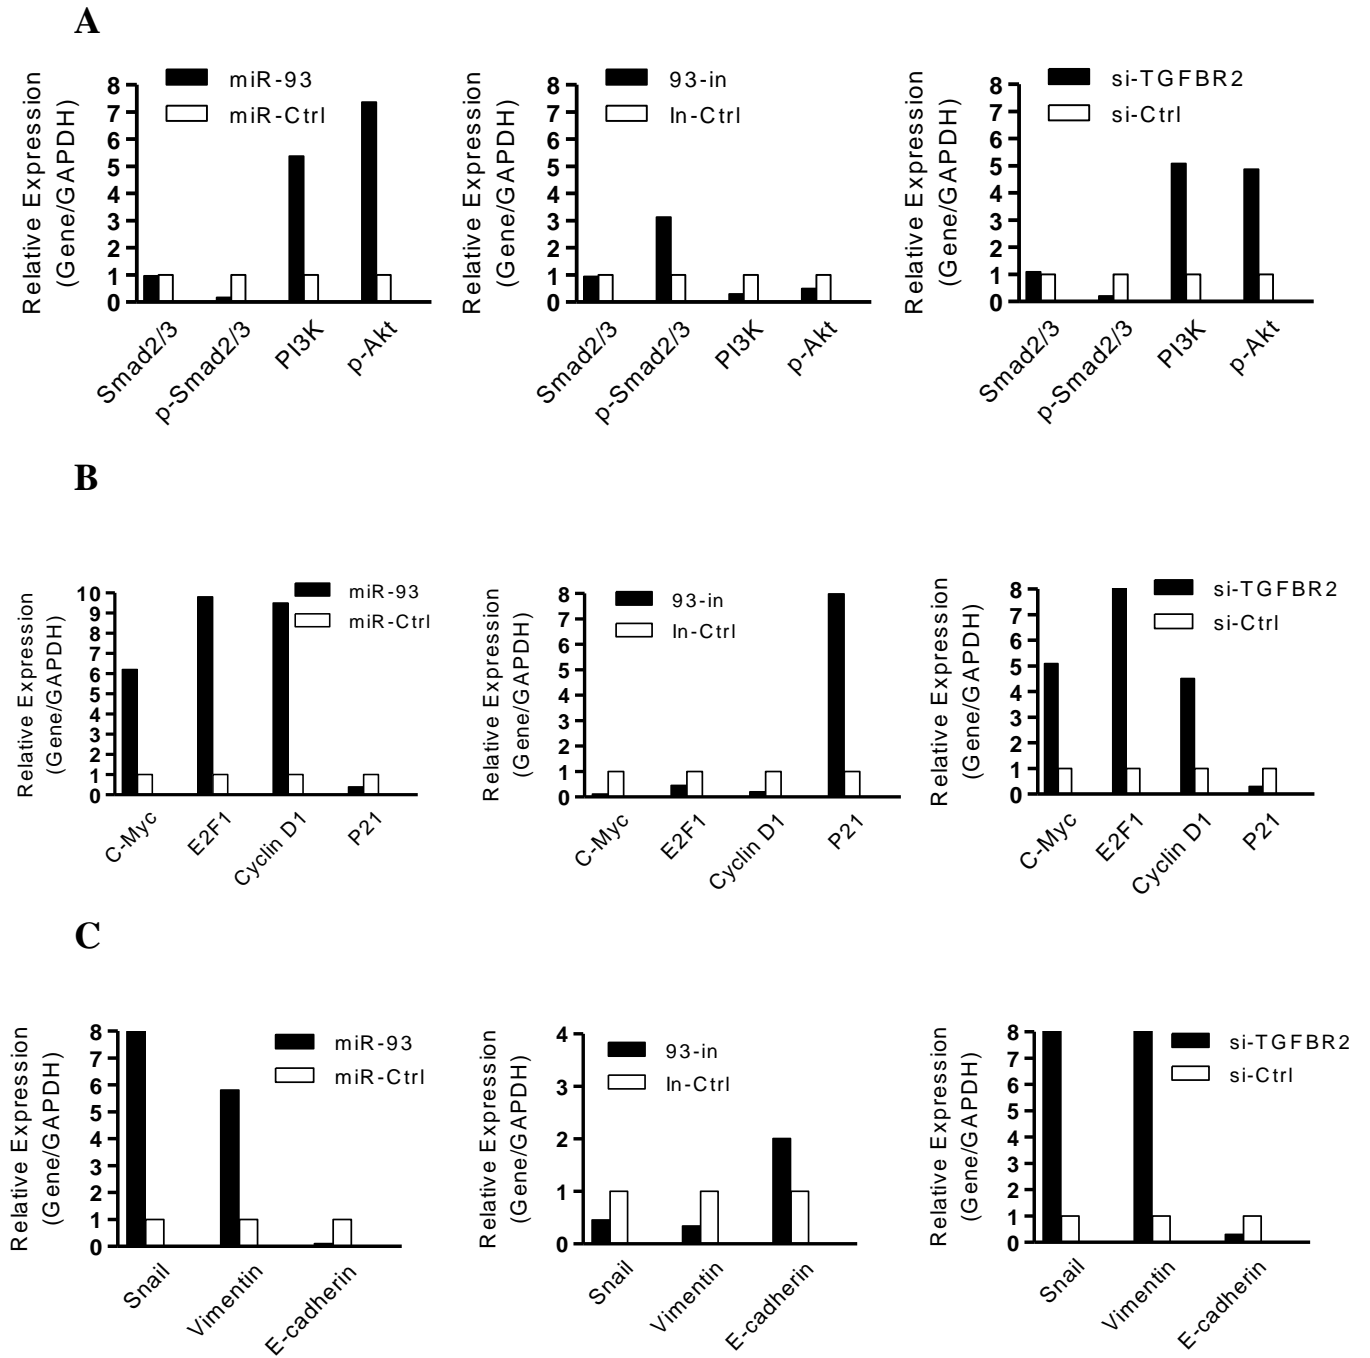

**Supplementary Figure 12** The histograms of the quantification for the western bands. **(A)** Western blotting analyses of Smad2/3 and its phosphorylation as well as PI3K and p-Akt in the indicated cell groups. **(B)** Western blotting analyses of C-myc, E2F1, cyclin D1, CDK4 and p21 in the indicated cell groups. **(C)** Western blotting analyses of Snail, E-cadherin, and Vimentin in the indicated cell groups. All of gene expression levels were semi-quantified by analysis of the Western blot with Gel-Pro Analyzer software.
